# Supplementary material for: Analysis of the Effect of the Surface Inclination Angle on the Roughness of Polymeric Parts Obtained with Fused Filament Fabrication Technology
Source: MDPI journal article supplement (doi:10.3390/polym15030585), 2023-01-23
Supplement: s1 [file s1]

# Supplementary Materials

## Supplementary Tables

**Table S1.** Preliminary study: Gray ABS. Affected planes.

| Gray ABS  |             |        |    |             |        |    |             |        |    |
|-----------|-------------|--------|----|-------------|--------|----|-------------|--------|----|
|           | Lines       |        |    | Concentric  |        |    | Zigzag      |        |    |
|           | d1          | d2     | d3 | d1          | d2     | d3 | d1          | d2     | d3 |
| <b>h1</b> | 0°          | 0°     | 0° | 0°          | 0°     | 0° | 0°          | 0°     | 0° |
| <b>h2</b> | 0°, 5°      | 0°, 5° | 0° | 0°, 5°      | 0°, 5° | 0° | 0°, 5°      | 0°, 5° | 0° |
| <b>h3</b> | 0°, 5°, 10° | 0°, 5° | 0° | 0°, 5°, 10° | 0°, 5° | 0° | 0°, 5°, 10° | 0°, 5° | 0° |

**Table S2.** Preliminary study: Black Nylon. Affected plane.

| Black Nylon |        |        |    |            |        |    |        |        |    |
|-------------|--------|--------|----|------------|--------|----|--------|--------|----|
|             | Lines  |        |    | Concentric |        |    | Zigzag |        |    |
|             | d1     | d2     | d3 | d1         | d2     | d3 | d1     | d2     | d3 |
| <b>h1</b>   | 0°     | 0°     | 0° | 0°         | 0°     | 0° | 0°     | 0°     | 0° |
| <b>h2</b>   | 0°, 5° | 0°, 5° | 0° | 0°, 5°     | 0°, 5° | 0° | 0°, 5° | 0°, 5° | 0° |
| <b>h3</b>   | 0°, 5° | 0°, 5° | 0° | 0°, 5°     | 0°, 5° | 0° | 0°, 5° | 0°, 5° | 0° |

**Table S3.** Preliminary study: Transparent PLA. Affected planes.

| Transparent PLA |             |        |    |             |        |    |             |        |    |
|-----------------|-------------|--------|----|-------------|--------|----|-------------|--------|----|
|                 | Lines       |        |    | Concentric  |        |    | Zigzag      |        |    |
|                 | d1          | d2     | d3 | d1          | d2     | d3 | d1          | d2     | d3 |
| <b>h1</b>       | 0°          | 0°     | 0° | 0°          | 0°     | 0° | 0°          | 0°     | 0° |
| <b>h2</b>       | 0°, 5°      | 0°, 5° | 0° | 0°, 5°      | 0°, 5° | 0° | 0°, 5°      | 0°, 5° | 0° |
| <b>h3</b>       | 0°, 5°, 10° | 0°, 5° | 0° | 0°, 5°, 10° | 0°, 5° | 0° | 0°, 5°, 10° | 0°, 5° | 0° |

**Table S4.** Ra, Rq and Rz values with h1d1ABS study case.

| Plane      | (h1d1ABS)       |                    |                 |                    |                 |                    |
|------------|-----------------|--------------------|-----------------|--------------------|-----------------|--------------------|
|            | Ra (μm)         |                    | Rq (μm)         |                    | Rz (μm)         |                    |
|            | Arithmetic Mean | Standard Deviation | Arithmetic Mean | Standard Deviation | Arithmetic Mean | Standard Deviation |
| <b>0°</b>  | 1.90            | 0.27               | 2.43            | 0.33               | 13.90           | 1.89               |
| <b>5°</b>  | 9.94            | 0.56               | 12.63           | 0.60               | 56.49           | 2.93               |
| <b>10°</b> | 12.34           | 0.17               | 14.79           | 0.25               | 59.52           | 1.88               |
| <b>20°</b> | 12.95           | 0.18               | 15.01           | 0.18               | 56.30           | 1.32               |
| <b>45°</b> | 9.64            | 0.34               | 12.00           | 0.46               | 56.86           | 2.19               |
| <b>70°</b> | 7.98            | 0.53               | 10.16           | 0.64               | 48.41           | 3.95               |
| <b>85°</b> | 6.00            | 0.26               | 7.34            | 0.35               | 35.25           | 3.31               |
| <b>90°</b> | 4.63            | 0.19               | 5.62            | 0.23               | 25.96           | 2.59               |

**Table S5.** Ra, Rq and Rz values with h1d2Nylon study case

| Plane | (h1d2Nylon)     |                    |                 |                    |                 |                    |
|-------|-----------------|--------------------|-----------------|--------------------|-----------------|--------------------|
|       | Ra (μm)         |                    | Rq (μm)         |                    | Rz (μm)         |                    |
|       | Arithmetic Mean | Standard Deviation | Arithmetic Mean | Standard Deviation | Arithmetic Mean | Standard Deviation |

|     |       |      |       |      |       |      |
|-----|-------|------|-------|------|-------|------|
| 0°  | 1.83  | 0.07 | 2.27  | 0.08 | 11.32 | 0.55 |
| 5°  | 11.09 | 0.54 | 13.61 | 0.83 | 62.34 | 8.90 |
| 10° | 10.89 | 0.50 | 12.65 | 0.55 | 48.05 | 1.19 |
| 20° | 10.83 | 0.08 | 12.73 | 0.08 | 50.44 | 1.06 |
| 45° | 9.88  | 0.18 | 12.09 | 0.27 | 54.33 | 1.32 |
| 70° | 6.34  | 0.54 | 8.28  | 0.35 | 39.75 | 1.79 |
| 85° | 7.62  | 0.82 | 9.55  | 0.94 | 46.65 | 5.37 |
| 90° | 6.68  | 0.68 | 7.86  | 0.82 | 35.09 | 2.79 |

Table S6. Ra, Rq and Rz values with h1d3PLA study case.

| Plane | (h1d3PLA)       |                    |                 |                    |                 |                    |
|-------|-----------------|--------------------|-----------------|--------------------|-----------------|--------------------|
|       | Ra (μm)         |                    | Rq (μm)         |                    | Rz (μm)         |                    |
|       | Arithmetic Mean | Standard Deviation | Arithmetic Mean | Standard Deviation | Arithmetic Mean | Standard Deviation |
| 0°    | 2.21            | 0.40               | 2.92            | 0.54               | 18.43           | 5.84               |
| 5°    | 9.25            | 0.16               | 11.96           | 0.16               | 53.66           | 1.67               |
| 10°   | 12.44           | 0.35               | 14.69           | 0.35               | 57.08           | 1.86               |
| 20°   | 12.19           | 0.18               | 14.05           | 0.20               | 52.11           | 1.42               |
| 45°   | 8.42            | 0.23               | 10.52           | 0.35               | 52.93           | 4.15               |
| 70°   | 5.87            | 0.40               | 7.57            | 0.44               | 37.81           | 2.68               |
| 85°   | 5.57            | 0.11               | 6.79            | 0.16               | 32.19           | 1.82               |
| 90°   | 4.51            | 0.14               | 5.49            | 0.22               | 25.46           | 2.41               |

Table S7. Ra average values.

| Angle   | h1d1A  | h1d2N  | h1d3P  | h2d1N  | h2d2P  | h2d3A  | h3d1P  | h3d2A  | h3d3N  | Average |
|---------|--------|--------|--------|--------|--------|--------|--------|--------|--------|---------|
| 0°      | 1.895  | 1.832  | 2.207  | 3.915  | 3.388  | 10.899 | 4.066  | 2.698  | 2.698  | 3.733   |
| 5°      | 9.942  | 11.091 | 9.248  | 12.279 | 11.266 | 11.566 | 11.042 | 9.744  | 9.744  | 10.658  |
| 10°     | 12.337 | 10.892 | 12.438 | 17.435 | 16.314 | 17.861 | 19.099 | 16.353 | 16.353 | 15.454  |
| 20°     | 12.946 | 10.833 | 12.187 | 17.894 | 19.744 | 19.296 | 26.863 | 27.272 | 27.272 | 19.367  |
| 45°     | 9.635  | 9.877  | 8.420  | 14.574 | 11.025 | 14.219 | 21.341 | 21.698 | 21.698 | 14.721  |
| 70°     | 7.982  | 6.339  | 5.867  | 9.412  | 8.040  | 7.953  | 13.756 | 11.766 | 11.766 | 9.209   |
| 85°     | 6.004  | 7.623  | 5.572  | 8.813  | 7.270  | 8.296  | 11.921 | 11.056 | 11.056 | 8.623   |
| 90°     | 4.632  | 6.684  | 4.513  | 8.090  | 7.921  | 6.914  | 11.155 | 10.977 | 10.977 | 7.985   |
| Average | 8.171  | 8.146  | 7.556  | 11.551 | 10.621 | 12.125 | 14.905 | 13.945 | 13.945 | 11.219  |

Table S8. DOE values for ANOVA.

| h | d | Mat | Obs. | Var 1 | Var 2  | Var 3  | Var 4  | Var 5  | Var 6 | Var 7 | Var 8 |
|---|---|-----|------|-------|--------|--------|--------|--------|-------|-------|-------|
| 1 | 1 | A   | 1    | 1.720 | 9.453  | 12.368 | 12.993 | 9.393  | 7.761 | 6.298 | 4.815 |
| 1 | 1 | A   | 2    | 1.837 | 10.040 | 12.126 | 13.241 | 9.807  | 8.883 | 5.628 | 4.417 |
| 1 | 1 | A   | 3    | 2.293 | 9.665  | 12.225 | 12.822 | 10.150 | 8.030 | 6.108 | 4.439 |
| 1 | 1 | A   | 4    | 1.603 | 10.876 | 12.576 | 12.822 | 9.344  | 7.656 | 5.851 | 4.730 |
| 1 | 1 | A   | 5    | 2.023 | 9.676  | 12.390 | 12.852 | 9.482  | 7.584 | 6.135 | 4.761 |
| 1 | 2 | N   | 1    | 1.949 | 10.342 | 10.458 | 10.785 | 9.879  | 6.560 | 8.098 | 7.256 |
| 1 | 2 | N   | 2    | 1.797 | 10.933 | 10.307 | 10.744 | 9.716  | 5.464 | 8.400 | 7.039 |
| 1 | 2 | N   | 3    | 1.796 | 11.309 | 11.464 | 10.823 | 9.718  | 6.570 | 7.575 | 6.284 |
| 1 | 2 | N   | 4    | 1.847 | 11.827 | 11.228 | 10.958 | 10.142 | 6.218 | 6.269 | 5.676 |
| 1 | 2 | N   | 5    | 1.771 | 11.045 | 11.004 | 10.855 | 9.932  | 6.886 | 7.776 | 7.169 |
| 1 | 3 | P   | 1    | 2.647 | 9.186  | 12.496 | 11.924 | 8.285  | 6.330 | 5.420 | 4.760 |
| 1 | 3 | P   | 2    | 2.467 | 9.067  | 12.595 | 12.326 | 8.722  | 5.743 | 5.619 | 4.446 |

|   |   |   |   |        |        |        |        |        |        |        |        |
|---|---|---|---|--------|--------|--------|--------|--------|--------|--------|--------|
| 1 | 3 | P | 3 | 1.892  | 9.415  | 11.831 | 12.091 | 8.301  | 5.873  | 5.652  | 4.402  |
| 1 | 3 | P | 4 | 1.696  | 9.166  | 12.597 | 12.364 | 8.604  | 5.283  | 5.491  | 4.478  |
| 1 | 3 | P | 5 | 2.336  | 9.407  | 12.673 | 12.232 | 8.190  | 6.108  | 5.681  | 4.482  |
| 2 | 1 | N | 1 | 4.199  | 11.994 | 17.685 | 18.754 | 14.441 | 9.260  | 8.384  | 8.137  |
| 2 | 1 | N | 2 | 4.208  | 13.836 | 17.996 | 17.583 | 14.744 | 9.000  | 8.389  | 8.251  |
| 2 | 1 | N | 3 | 3.714  | 13.070 | 17.306 | 17.308 | 14.504 | 9.053  | 8.960  | 8.013  |
| 2 | 1 | N | 4 | 3.601  | 11.269 | 17.267 | 18.082 | 14.274 | 10.020 | 9.305  | 7.696  |
| 2 | 1 | N | 5 | 3.853  | 11.229 | 16.924 | 17.747 | 14.911 | 9.729  | 9.028  | 8.354  |
| 2 | 2 | P | 1 | 3.525  | 9.619  | 16.902 | 19.502 | 11.019 | 8.392  | 7.560  | 7.753  |
| 2 | 2 | P | 2 | 3.166  | 13.162 | 16.855 | 19.262 | 11.064 | 8.198  | 7.294  | 8.169  |
| 2 | 2 | P | 3 | 3.131  | 10.129 | 15.978 | 19.856 | 11.294 | 8.020  | 7.002  | 7.666  |
| 2 | 2 | P | 4 | 3.843  | 12.191 | 15.863 | 20.074 | 10.828 | 7.741  | 7.402  | 7.889  |
| 2 | 2 | P | 5 | 3.275  | 11.233 | 15.974 | 20.026 | 10.921 | 7.851  | 7.095  | 8.132  |
| 2 | 3 | A | 1 | 10.690 | 11.719 | 17.820 | 19.353 | 14.503 | 8.271  | 8.069  | 6.981  |
| 2 | 3 | A | 2 | 12.040 | 10.425 | 17.956 | 19.673 | 14.010 | 8.131  | 8.591  | 6.893  |
| 2 | 3 | A | 3 | 9.884  | 11.878 | 17.888 | 19.749 | 13.716 | 8.046  | 8.417  | 6.814  |
| 2 | 3 | A | 4 | 10.980 | 12.033 | 18.237 | 18.856 | 14.244 | 7.514  | 8.494  | 6.918  |
| 2 | 3 | A | 5 | 10.903 | 11.775 | 17.406 | 18.851 | 14.625 | 7.805  | 7.912  | 6.965  |
| 3 | 1 | P | 1 | 3.345  | 10.323 | 20.524 | 26.802 | 21.308 | 13.573 | 12.008 | 10.957 |
| 3 | 1 | P | 2 | 4.889  | 11.125 | 18.818 | 26.649 | 21.719 | 13.645 | 11.760 | 11.241 |
| 3 | 1 | P | 3 | 4.246  | 11.052 | 18.095 | 26.891 | 21.188 | 13.303 | 11.559 | 11.182 |
| 3 | 1 | P | 4 | 3.515  | 11.493 | 20.562 | 26.934 | 21.400 | 14.140 | 12.378 | 11.186 |
| 3 | 1 | P | 5 | 4.339  | 11.220 | 17.500 | 27.039 | 21.093 | 14.122 | 11.903 | 11.209 |
| 3 | 2 | A | 1 | 2.504  | 9.689  | 17.379 | 27.639 | 21.831 | 12.178 | 10.727 | 10.800 |
| 3 | 2 | A | 2 | 2.990  | 9.584  | 16.560 | 27.885 | 21.479 | 11.514 | 11.590 | 10.953 |
| 3 | 2 | A | 3 | 2.335  | 10.377 | 16.582 | 26.751 | 21.717 | 11.730 | 11.001 | 10.875 |
| 3 | 2 | A | 4 | 2.469  | 8.534  | 15.660 | 26.618 | 21.347 | 11.970 | 10.932 | 11.145 |
| 3 | 2 | A | 5 | 3.196  | 10.537 | 15.588 | 27.470 | 22.117 | 11.440 | 11.031 | 11.112 |
| 3 | 3 | N | 1 | 2.534  | 9.790  | 18.108 | 24.070 | 18.317 | 14.671 | 12.016 | 13.289 |
| 3 | 3 | N | 2 | 2.612  | 10.291 | 18.881 | 24.664 | 18.568 | 15.152 | 11.012 | 13.117 |
| 3 | 3 | N | 3 | 2.503  | 11.445 | 17.886 | 24.177 | 18.562 | 14.623 | 11.724 | 12.251 |
| 3 | 3 | N | 4 | 2.710  | 10.644 | 17.648 | 24.773 | 18.146 | 15.377 | 12.195 | 12.143 |
| 3 | 3 | N | 5 | 2.161  | 10.549 | 19.476 | 24.174 | 18.636 | 14.709 | 11.666 | 11.932 |

Table S9. Factors for ANOVA.

| Factor | Type  | Levels | Values  |
|--------|-------|--------|---------|
| h      | Fixed | 3      | 1; 2; 3 |
| d      | Fixed | 3      | 1; 2; 3 |
| Mat    | Fixed | 3      | 1; 2; 3 |

Table S10. Analysis of variance.

|       | DF | SS Adjust. | MS Adjust. | F-Value  | p-Value |
|-------|----|------------|------------|----------|---------|
| h     | 2  | 301.657    | 150.829    | 12200.88 | 0.003   |
| d     | 2  | 0.824      | 0.412      | 33.35    | 0.029   |
| Mat   | 2  | 8.233      | 4.116      | 332.98   | 0.000   |
| Error | 2  | 0.025      | 0.012      |          |         |
| Total | 8  | 310.739    |            |          |         |

**Table S11.** Summary of the model ANOVA.

| S        | R-square | R-square (adjusted) |
|----------|----------|---------------------|
| 0.110997 | 96.758%  | 96.528%             |

**Table 12.** Means and confidence intervals for ANOVA.

| Level        | Cases | Arithmetic Mean | Standard Error | Lower Limit | Upper Limit |
|--------------|-------|-----------------|----------------|-------------|-------------|
| Media Global | 9     | 19.0454         |                |             |             |
| Factor h     |       |                 |                |             |             |
| 1            | 3     | 11.9887         | 0.0641927      | 11.7125     | 12.2649     |
| 2            | 3     | 18.9783         | 0.0641927      | 18.7021     | 19.2545     |
| 3            | 3     | 26.1693         | 0.0641927      | 25.8931     | 26.4455     |
| Factor d     |       |                 |                |             |             |
| 1            | 3     | 19.2347         | 0.0641927      | 18.9585     | 19.5109     |
| 2            | 3     | 19.2833         | 0.0641927      | 19.0071     | 19.5595     |
| 3            | 3     | 18.6183         | 0.0641927      | 18.3421     | 18.8945     |
| Factor Mat   |       |                 |                |             |             |
| 1            | 3     | 19.8383         | 0.0641927      | 19.5621     | 20.1145     |
| 2            | 3     | 17.7000         | 0.0641927      | 17.4238     | 17.9762     |
| 3            | 3     | 19.5980         | 0.0641927      | 19.3218     | 19.8742     |

**Table S13.** Coefficients of the 20° regression equation from ANOVA.

| Parameter | Coefficient | Standard Error | T-Value  | p-Value |
|-----------|-------------|----------------|----------|---------|
| Constante | 3.65821     | 0.725231       | 5.04399  | 0.000   |
| h         | 156.995     | 4.49415        | 034.9332 | 0.000   |
| d         | −1.23191    | 0.712783       | −1.72831 | 0.0915  |
| Mat       | −1.201      | 2.02653        | −0.59264 | 0.5567  |

**Table S14.** Regression equation coefficients from ANOVA.

| Angle | Coef.  | h       | d      | Mat    |
|-------|--------|---------|--------|--------|
| 0°    | 2.712  | 9.404   | 4.080  | −9.718 |
| 5°    | 10.872 | 2.693   | −1.045 | 0.509  |
| 10°   | 8.123  | 65.207  | 0.800  | 2.167  |
| 20°   | 3.658  | 156.995 | −1.232 | −1.201 |
| 45°   | 4.186  | 125.096 | −2.409 | −7.943 |
| 70°   | 2.068  | 75.994  | −0.723 | −0.064 |
| 85°   | 3.211  | 57.875  | −0.613 | −0.987 |
| 90°   | 0.666  | 70.156  | −0.230 | 1.778  |

**Table S15.** Correlation matrix from ANOVA.

|          | Constant | h       | d       | Mat     |
|----------|----------|---------|---------|---------|
| Constant | 1.0000   | −0.6403 | −0.4750 | −0.5588 |
| h        | −0.6403  | 1.0000  | 0.0000  | 0.0000  |
| d        | −0.4750  | 0.0000  | 1.0000  | 0.0000  |
| Mat      | −0.5588  | 0.0000  | 0.0000  | 1.0000  |

Table S16. R-square vs angles.

| Angle        | 0°      | 5°     | 10°     | 20°    | 45°     | 70°    | 85°     | 90°     |
|--------------|---------|--------|---------|--------|---------|--------|---------|---------|
| R-square (%) | 22.8775 | 5.2927 | 69.3985 | 96.758 | 94.6567 | 84.565 | 88.0934 | 90.5954 |

## Supplementary Figures

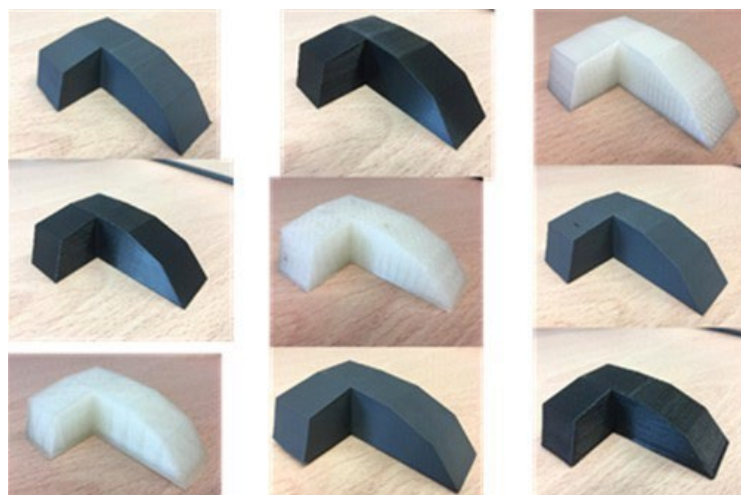

Figure S1. Specimens' configuration according the 3 × 3 Latin square design.

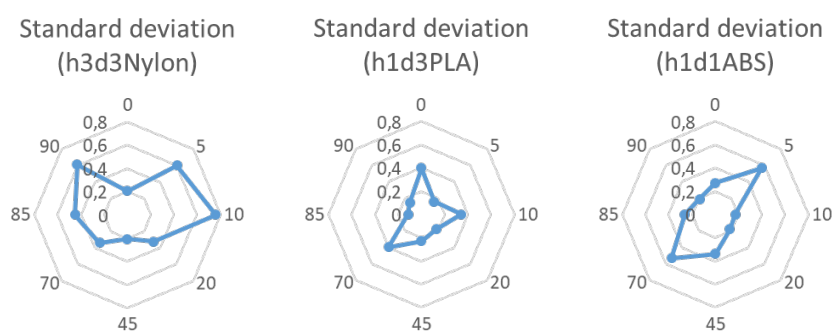

Figure S2. Examples of Standard deviations of Ra according to angles in three specimens.

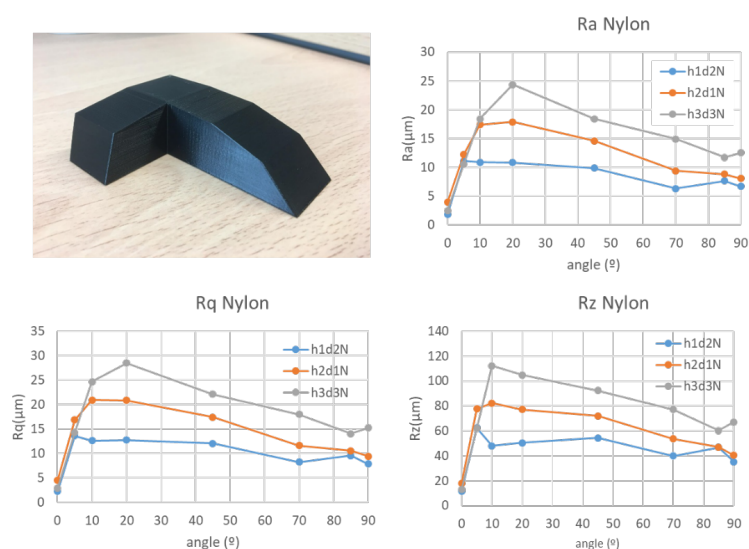

Figure S3. Average Ra, Rq and Rz values for Nylon material specimens.

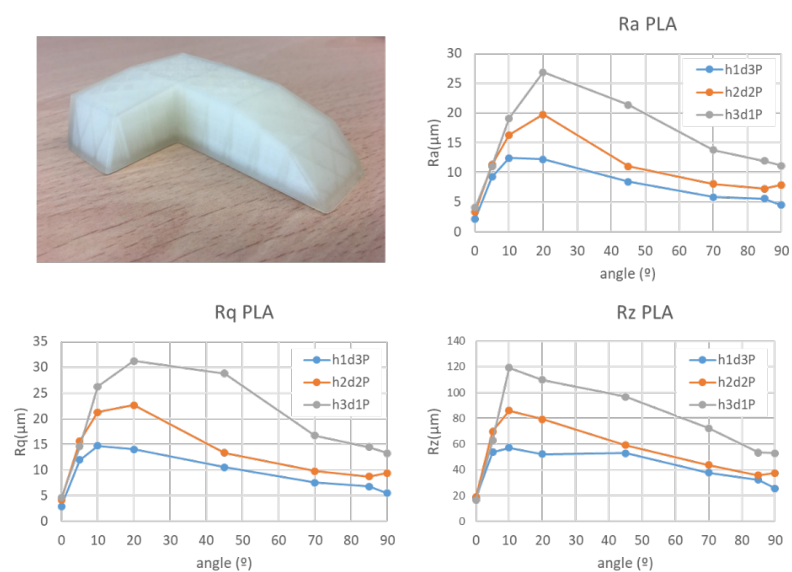

**Figure S4.** Average Ra, Rq and Rz values for PLA material specimens.

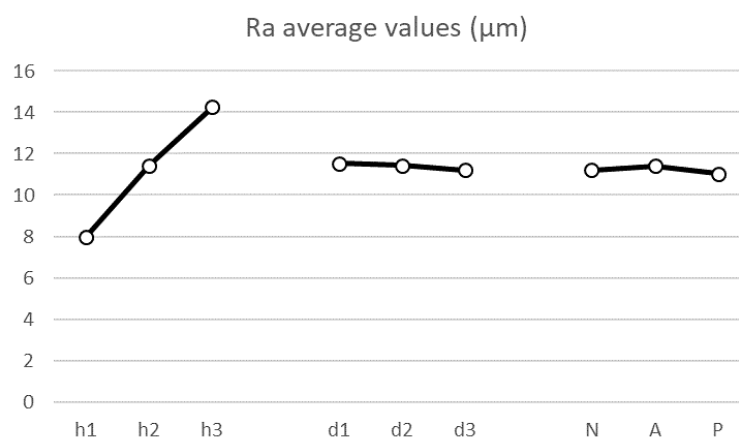

**Figure S5.** Ra average values for each factor.

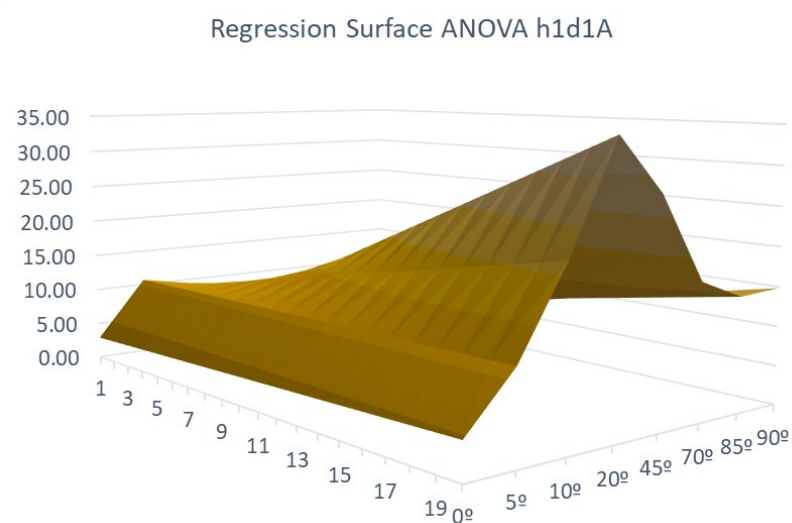

**Figure S6.** Curves evolution with different  $h$  values and only one  $d1A$  combination.

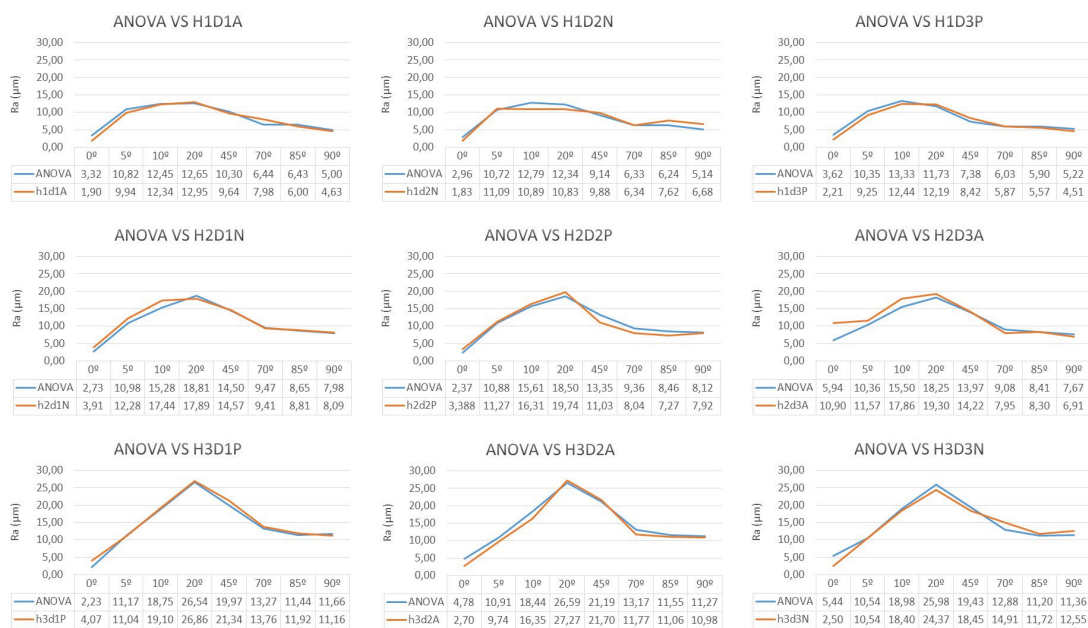

Figure S7. Ra values of regression equations by ANOVA vs. testing values.

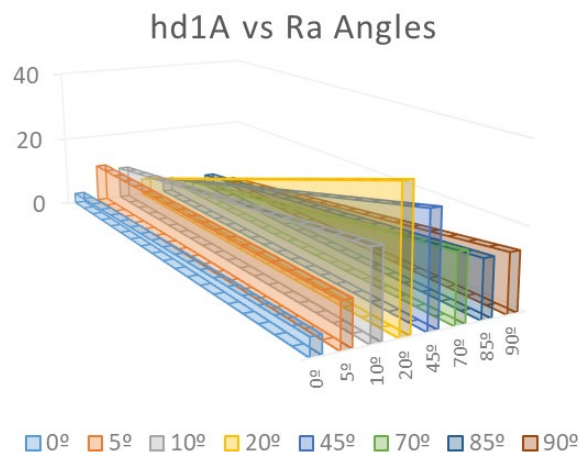

Figure S8. *hd1A* specimen vs Ra angles.

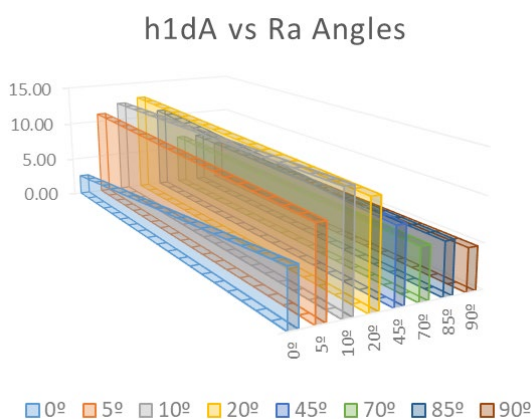

Figure S9. *h1dA* specimen vs Ra angles.
